# Supplementary material for: Ascomylactam C Induces an Immunogenic Cell Death Signature via Mitochondria-Associated ER Stress in Lung Cancer and Melanoma
Source: MDPI journal article supplement (doi:10.3390/md21120600), 2023-11-21
Supplement: s1 [file s1]

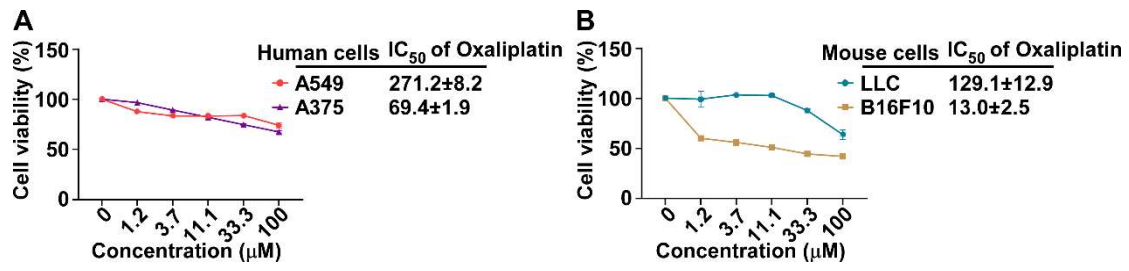

**Figure S1.** MTT assay to detect the cell viability of oxaliplatin in human cancer cells (A549, A375) (A) and mouse cancer cells (LLC, B16F10) (B).

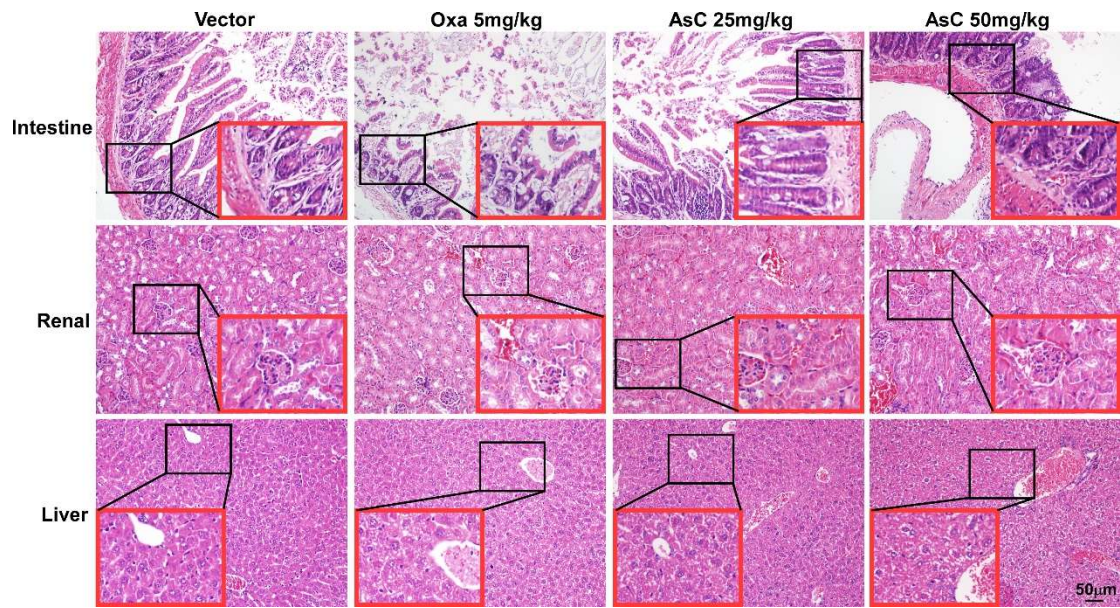

**Figure S2.** H&E staining to observe the damage to mouse small intestine, renal and liver tissue treated with AsC and Oxaliplatin.

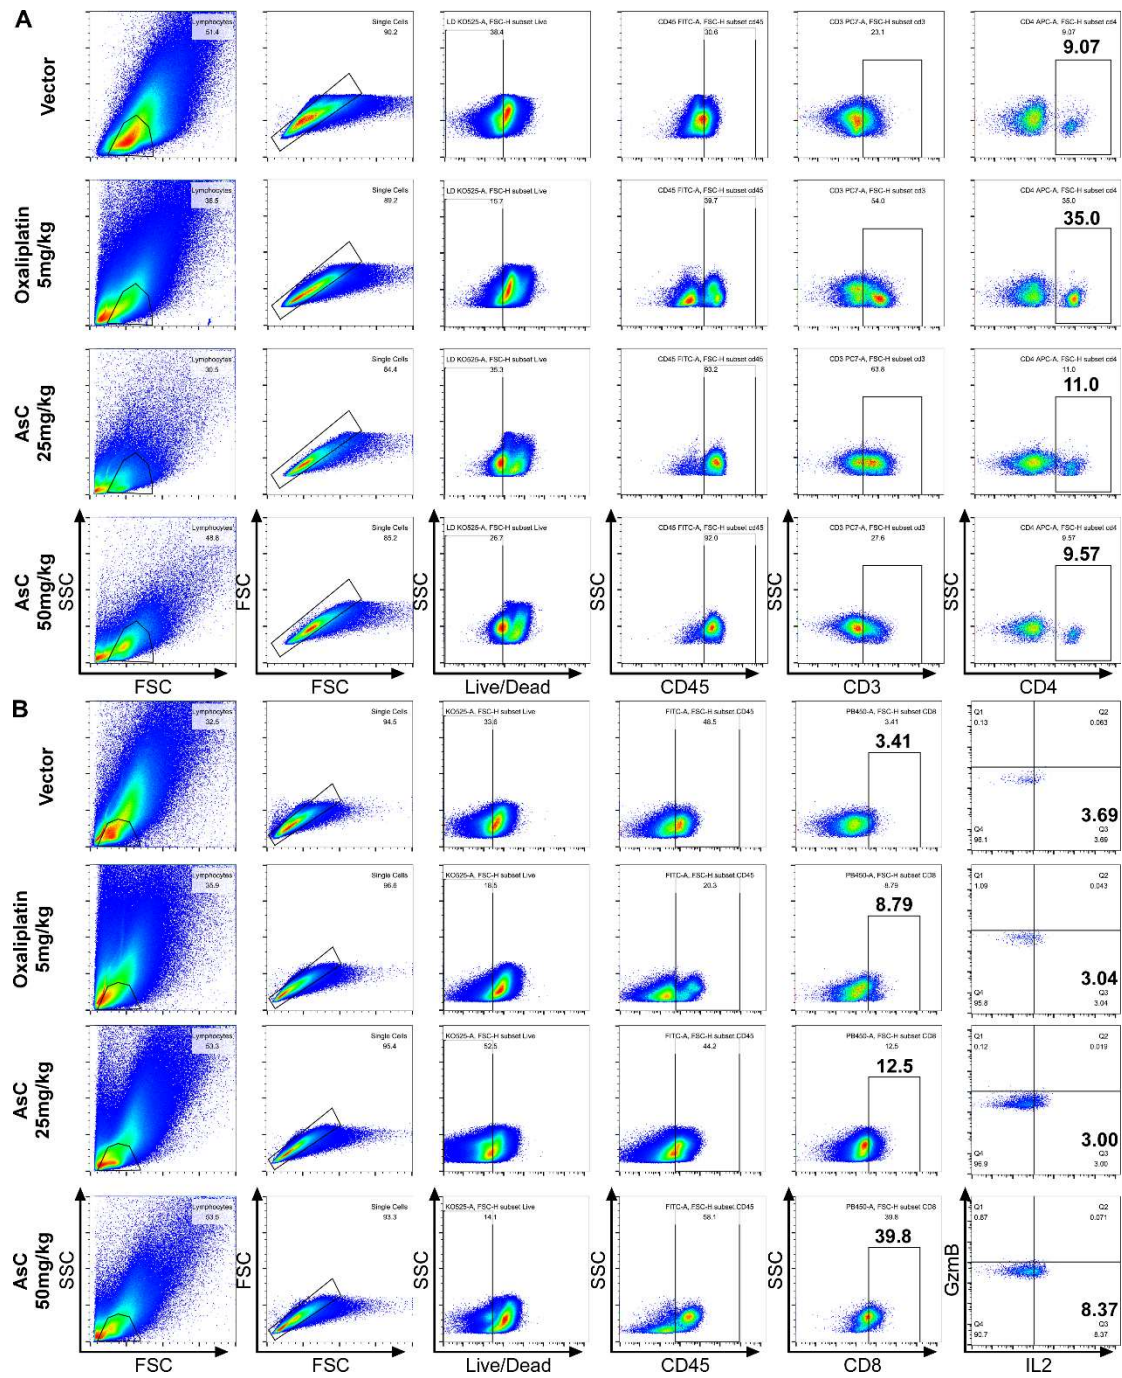

**Figure S3.** Flow cytometry analysis of the effects of AsC and Oxaliplatin treatment on the proportion of (A) CD4<sup>+</sup> T and (B) CD8<sup>+</sup> T cells, GzmB<sup>+</sup> T cells and IL2<sup>+</sup> T cells in LLC.

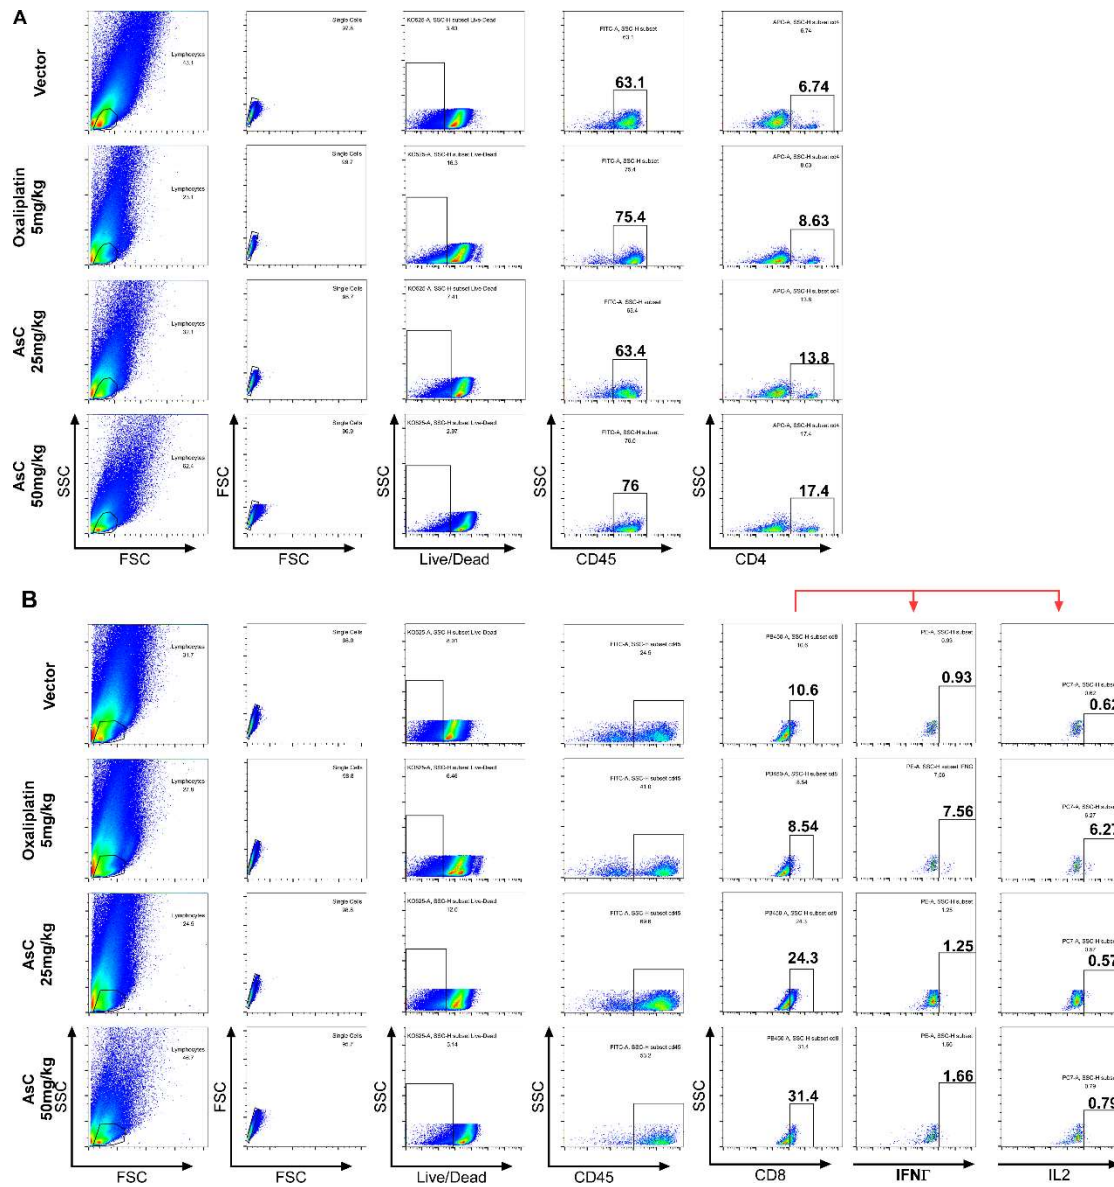

**Figure S4.** Flow cytometry analysis of the effects of AsC and Oxaliplatin treatment on the proportion of (A) CD4<sup>+</sup> T and (B) CD8<sup>+</sup> T cells, IFN- $\gamma$ <sup>+</sup> T cells and IL2<sup>+</sup> T cells in B16F10.



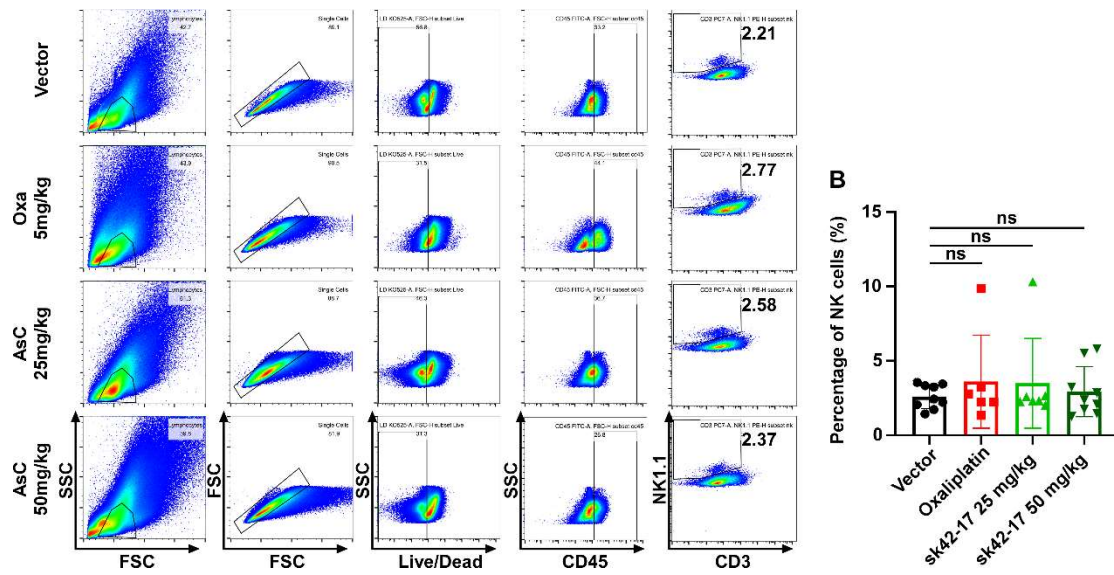

**Figure S5.** Flow cytometry analysis of the effects of AsC and Oxaliplatin treatment on the proportion of NK cells in LLC.
